# Supplementary material for: Efficiency exceeding 10% for inverted polymer solar cells with a ZnO/ionic liquid combined cathode interfacial layer
Source: Royal Society of Chemistry journal article supplement (doi:10.1039/c5ta00930h), 2015-01-01
Supplement: c5ta00930h1.pdf [file c5ta00930h1.pdf]

## Supporting Information

### Efficiency exceeding 10% for inverted polymer solar cells with ZnO/ionic liquid combined cathode interfacial layer

Wei Yu,<sup>‡</sup> Linqun Huang,<sup>‡</sup> Dong Yang, Ping Fu, Lingyu Zhou, Jian Zhang\* and Can Li\*

#### Experimental Section

*Materials:* The donor polymers, polythieno[3,4-b]thiophene/benzodithiophene (PTB7) and poly[4,8-bis(5-(2-ethylhexyl)thiophen-2-yl)benzo[1,2-b:4,5-b']dithiophene-co-3-fluorothieno[3,4-b]thiophene-2-carboxylate] (PTB7-Th) were purchased from 1-Material, Inc. The acceptor fullerene derivative, [6,6]-phenyl-C71-butyric acid methyl ester (PC<sub>71</sub>BM) was purchased from Solarmer Materials, Inc. 1-butyl-3-methylimidazolium tetrafluoroborate (C<sub>8</sub>H<sub>15</sub>N<sub>2</sub>BF<sub>4</sub>, [BMIM]BF<sub>4</sub>, >99.5%), 1-benzyl-3-methylimidazolium chloride (C<sub>11</sub>H<sub>13</sub>N<sub>2</sub>Cl, [BzMIM]Cl, >99.5%) and all of the solvents, including the solvent additives, were purchased from Sigma-Aldrich. All materials were used as received.

*Characterization:* A computer-controlled Keithley 2400 source measure unit was used to characterized the *J-V* performance of devices with an AM 1.5G oriel solar simulator at illumination intensity of 100 mW cm<sup>-2</sup>. The corresponding external quantum efficiency was characterized on the QTest Station 2000ADI system (Crowntech. Inc., USA). The ultraviolet-visible absorption spectra (UV-vis) and optical transmittance spectra were measured on a Varian Cary 5500 spectrometer. Atomic force microscopy (AFM) height images of ZnO, [BzMIM]Cl, [BMIM]BF<sub>4</sub> and ZnO/[BMIM]BF<sub>4</sub> films were obtained using a Bruker Metrology Nanoscope III-D atomic force microscope in tapping mode under atmospheric conditions. The work function of ZnO, [BzMIM]Cl, [BMIM]BF<sub>4</sub> and ZnO/[BMIM]BF<sub>4</sub> were measured in air by scanning Kelvin probe microscopy (SKPM) with a Bruker Metrology Nanoscope III-D atomic force microscope. Conducting AFM tips (SCM-PIT/PtIr, Bruker, USA) were used for this study with a typical spring constant of 2.8 N m<sup>-1</sup> and a resonance

frequency of 75 kHz. XPS measurements were performed using a VG ESCALAB MK2 system with a monochromatized Al K $\alpha$  under a pressure of  $3.75 \times 10^{-9}$  Torr.

### **Electron extraction enhancement in ZnO/IL film**

Electrochemical impedance spectra (EIS) are used to investigate the polymer and interface properties of the inverted devices with ZnO and ZnO/IL as interface layers. Fig. 3e shows the Nyquist plots of devices measured at open-circuit voltage based on ZnO and ZnO/IL, with equivalent circuit model displayed in Fig. S3. The fitted equivalent circuit model composes of  $R_s$  and three components of  $R_1$ ,  $R_2$ , and  $R_3$  forming a parallel circuit with capacitors ( $C_1$ ,  $C_2$ , and  $C_3$ , respectively). The parameters of equivalent circuit are summarized in Table S1. The ( $R_1$ ,  $C_1$ ) and ( $R_3$ ,  $C_3$ ) components are primarily affected by the interface layer between electrodes and active layers. The ( $R_2$ ,  $C_2$ ) component is root in the active layer. The Nyquist plots that follow shows the  $R_1$ ,  $R_2$  and  $R_3$  of the devices with ZnO as interface layer are 1250, 210.3 and 13.5  $\Omega$ , respectively, while the devices based on ZnO/IL decreases to 233.8, 4.41 and 3.59  $\Omega$ , respectively. The extracted contact resistance is notable reduced when the devices with ZnO/IL as interface layer. Meanwhile, the  $C_2$  decreases from  $3.91 \times 10^{-9}$  to  $1.95 \times 10^{-9}$  F for devices with ZnO/IL. This indicates less carriers exist in active layer based on ZnO/IL and the result is in good agreement with electron mobility measurements that the ZnO/IL has higher electron mobility which insure that the carriers can timely extract from active layer to CILs. The increase of  $C_1$  (from  $2.67 \times 10^{-9}$  to  $4.58 \times 10^{-8}$  F) is demonstrated that the process occurs in device. From above all, it is very likely that the carriers can efficient reach to electrode from active layer based on ZnO/IL and thus resulting in the increase of  $J_{sc}$  and FF of the PSCs.

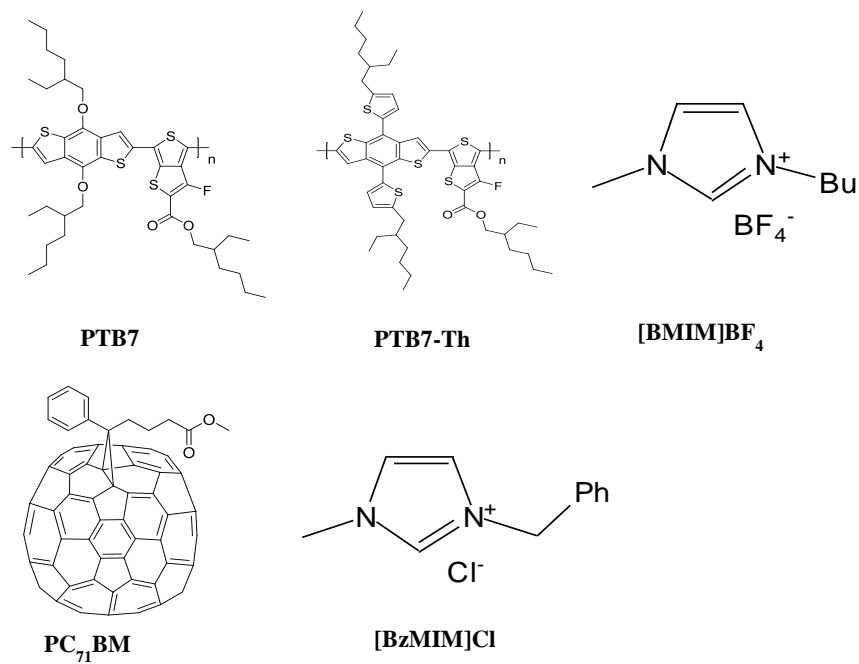

**Fig. S1** Chemical structures of donor polymers and IL used in devices.

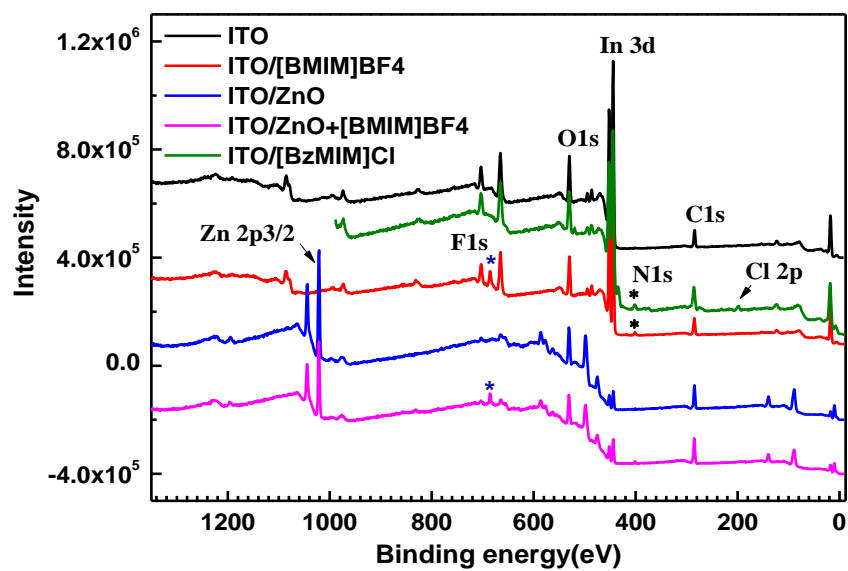

**(a) 0.1 wt% [BMIM]BF<sub>4</sub> on ITO**

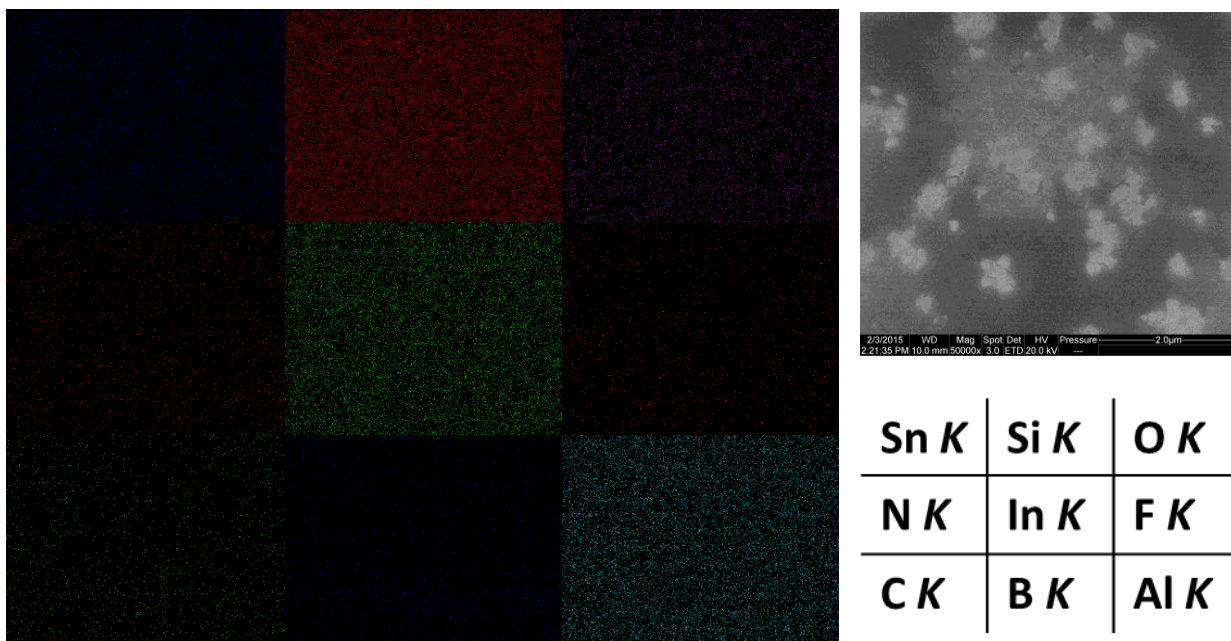

**(b) 0.1 wt% [BMIM]BF<sub>4</sub> on ITO/ZnO**

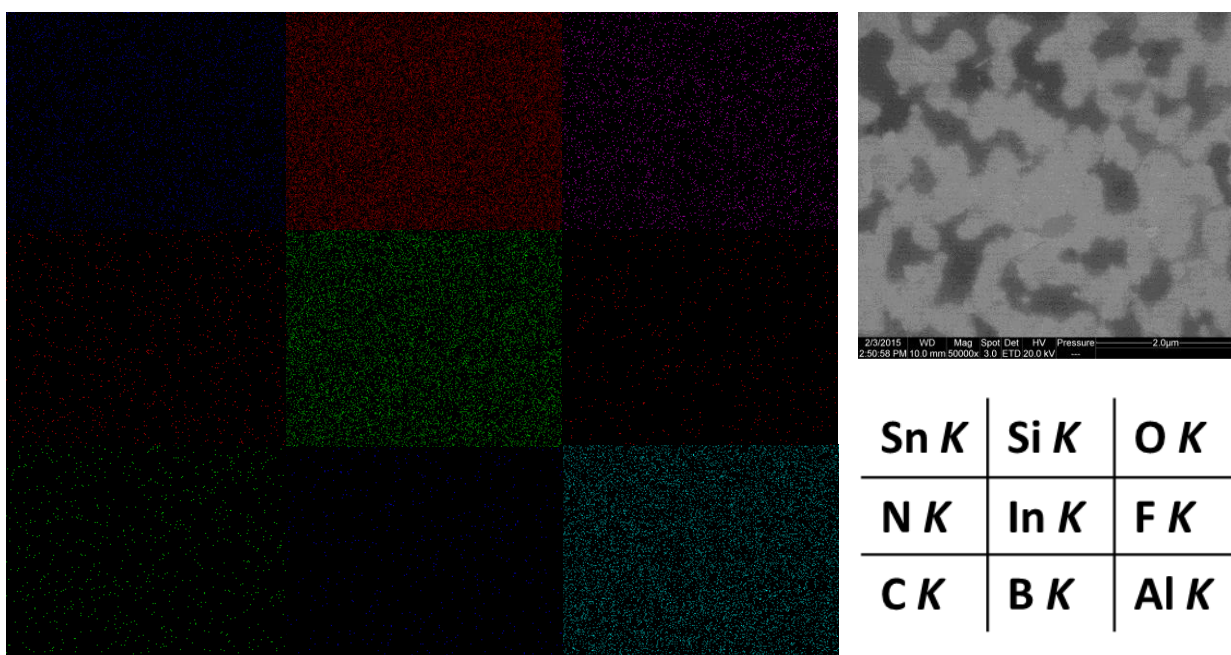

**Fig. S3** EDX mapping images of [BMIM]BF<sub>4</sub> on (a) ITO and (b) ITO/ZnO substrate.

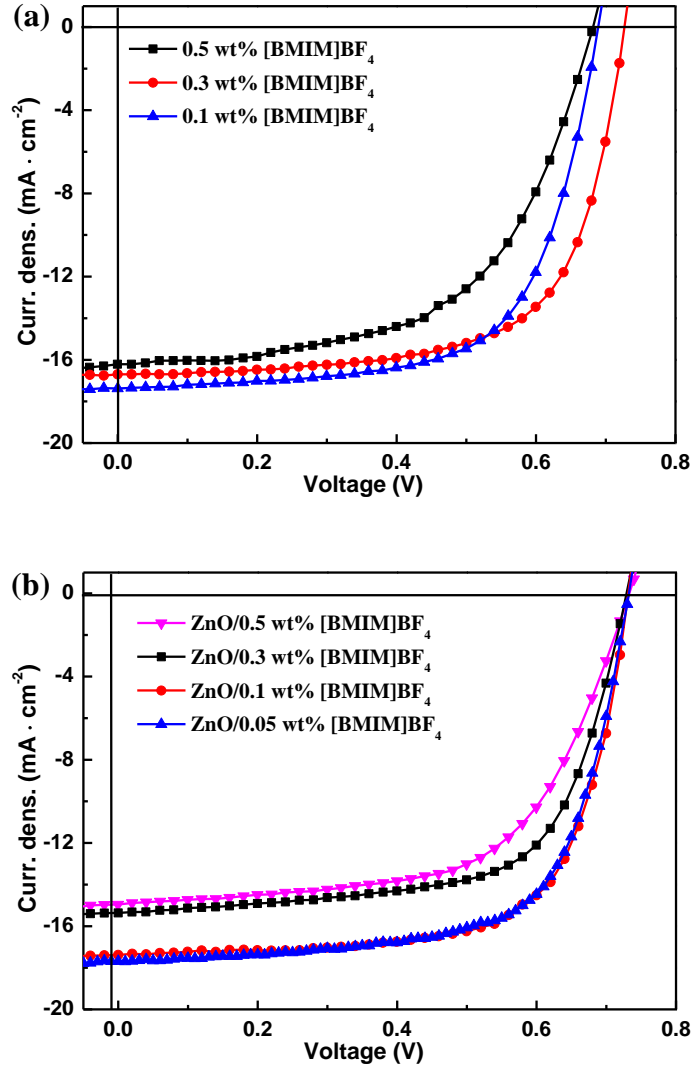

**Fig. S4** *J-V* characteristics of the PTB7:PC<sub>71</sub>BM inverted devices with different concentration of [BMIM]BF<sub>4</sub> on (a) ITO and (b) ITO/ZnO substrate.

**Table S1** The parameters of the devices with different concentration of [BMIM]BF<sub>4</sub> on ITO or ZnO substrate

|                                   | $J_{sc}$ (mA cm <sup>-2</sup> ) | $V_{oc}$ (V) | FF    | PCE (%) |
|-----------------------------------|---------------------------------|--------------|-------|---------|
| 0.5wt% [BMIM]BF <sub>4</sub>      | 16.20                           | 0.68         | 0.570 | 6.28    |
| 0.3wt% [BMIM]BF <sub>4</sub>      | 16.70                           | 0.72         | 0.676 | 8.13    |
| 0.1wt% [BMIM]BF <sub>4</sub>      | 17.36                           | 0.68         | 0.668 | 7.89    |
| ZnO/0.5wt% [BMIM]BF <sub>4</sub>  | 14.89                           | 0.72         | 0.617 | 6.62    |
| ZnO/0.3wt% [BMIM]BF <sub>4</sub>  | 15.36                           | 0.72         | 0.664 | 7.34    |
| ZnO/0.1wt% [BMIM]BF <sub>4</sub>  | 17.39                           | 0.72         | 0.696 | 8.71    |
| ZnO/0.05wt% [BMIM]BF <sub>4</sub> | 17.69                           | 0.73         | 0.674 | 8.70    |

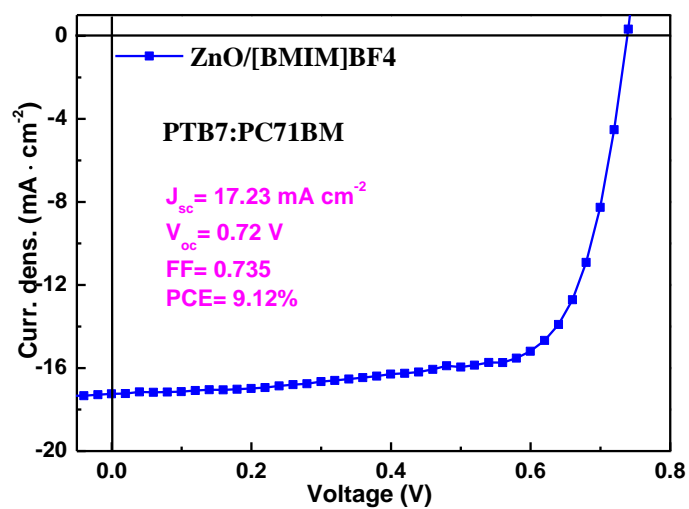

**Fig. S5** The  $J$ - $V$  curve of the best i-PSCs based on PTB7:PC<sub>71</sub>BM with ZnO/[BMIM]BF<sub>4</sub> as interfacial layer.

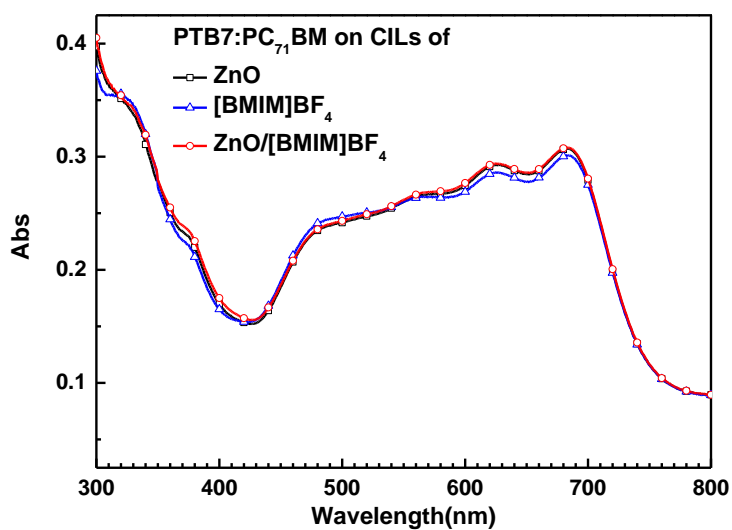

**Fig. S6** Absorption spectra of PTB7:PC<sub>71</sub>BM on CILs of ZnO, [BMIM]BF<sub>4</sub> and ZnO/[BMIM]BF<sub>4</sub>.

**Table S2** Contact Angles of Three Probing Liquids on Various Surfaces at Initial State, And the Calculated Surface Energies ( $\text{mN m}^{-1}$ )

|                                                                  |                        | ITO  | ITO/[BMIM]BF <sub>4</sub> | ITO/ZnO | ITO/ZnO/[BMIM]BF <sub>4</sub> |
|------------------------------------------------------------------|------------------------|------|---------------------------|---------|-------------------------------|
| Contact angle<br>(degree)                                        | <b>Water</b>           | 56±1 | 41±1                      | 81±1    | 70±1                          |
|                                                                  | <b>Ethylene Glycol</b> | 36±1 | 26±1                      | 62±1    | 61±1                          |
|                                                                  | <b>Hexadecane</b>      | 33±2 | 33±3                      | 42±2    | 36±2                          |
| Calculated surface<br>energy component<br>( $\text{mN m}^{-1}$ ) | $\gamma$               | 38.9 | 43.5                      | 26.7    | 27.2                          |
|                                                                  | $\gamma^{\text{LW}}$   | 23.2 | 23.2                      | 21.0    | 22.4                          |
|                                                                  | $\gamma^{\text{AB}}$   | 15.7 | 20.2                      | 5.7     | 4.8                           |
|                                                                  | $\gamma^+$             | 2.2  | 2.3                       | 0.81    | 0.26                          |
|                                                                  | $\gamma^-$             | 28.1 | 44.5                      | 10.0    | 22.3                          |

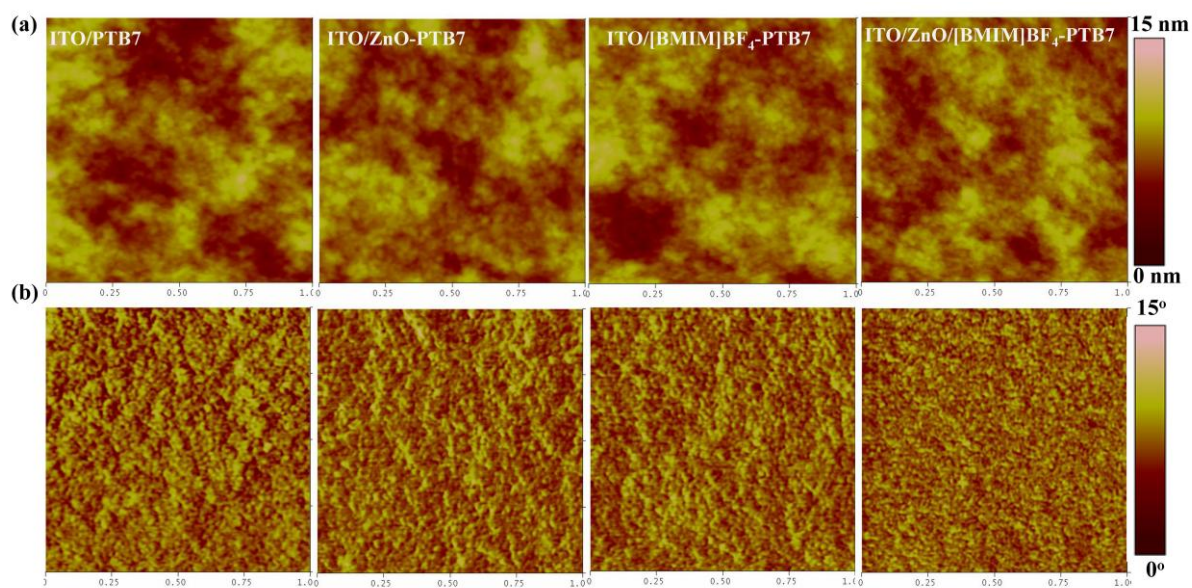

**Fig. S7** (a) AFM topography images ( $1 \mu\text{m} \times 1 \mu\text{m}$ ) and (b) phase images ( $1 \mu\text{m} \times 1 \mu\text{m}$ ) of PTB7:PC<sub>71</sub>BM on bare ITO and cathode interfacial layers of ZnO, [BMIM]BF<sub>4</sub> and ZnO/[BMIM]BF<sub>4</sub> films (from left to right).

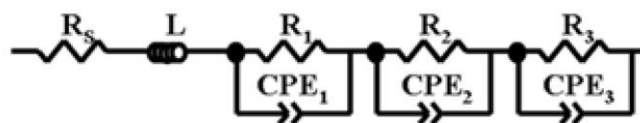

**Fig. S8** The equivalent circuit model for i-PSCs in electrochemical impedance spectra.

**Table S3.** Summarized parameters of the i-PSCs equivalent circuit with ZnO or ZnO/IL as interfacial layers measured at open voltage.

|                    | ZnO/IL  | ZnO     |
|--------------------|---------|---------|
| $R_s$ ( $\Omega$ ) | 31.86   | 26.89   |
| $R_1$ ( $\Omega$ ) | 233.80  | 1250.00 |
| $R_2$ ( $\Omega$ ) | 4.41    | 210.30  |
| $R_3$ ( $\Omega$ ) | 3.59    | 13.50   |
| $C_1$ (F)          | 4.57E-8 | 2.67E-9 |
| $C_2$ (F)          | 1.95E-9 | 3.91E-9 |
| $C_3$ (F)          | 3.29E-9 | 2.62E-9 |



**Table S4.** The calculated  $R_s$  and  $R_{sh}$  of the i-PSCs with ZnO and ZnO/[BMIM]BF<sub>4</sub> CIL.

| Active layer             | ITO/interlayer            | $R_s$ ( $\Omega \text{ cm}^2$ ) <sup>a</sup> | $R_{sh}$ ( $\text{k}\Omega \text{ cm}^2$ ) <sup>a</sup> |
|--------------------------|---------------------------|----------------------------------------------|---------------------------------------------------------|
| PTB7:PC <sub>71</sub> BM | ZnO                       | 10.28                                        | 4.53                                                    |
|                          | ZnO/[BMIM]BF <sub>4</sub> | 3.46                                         | 16.20                                                   |

<sup>a</sup>The series resistance ( $R_s$ ) stands for the slope of the  $J$ - $V$  curve at  $J = 0$  for the device and the shunt resistance ( $R_{sh}$ ) stands for the slope of the  $J$ - $V$  curve at  $V = 0$  for the device.

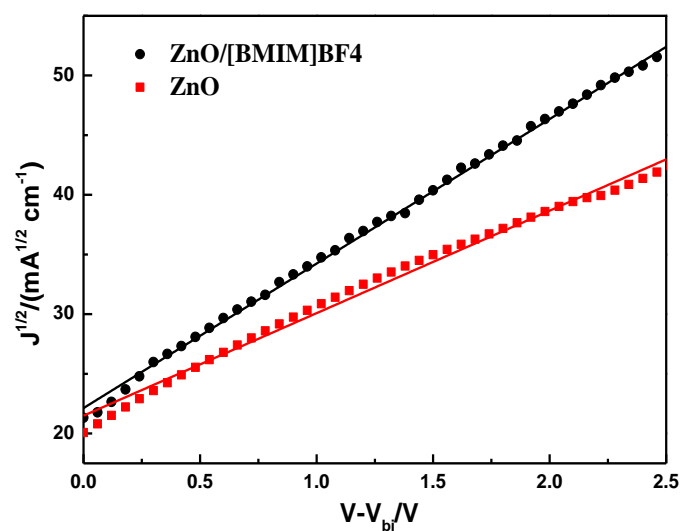

**Fig. S9**  $J^{1/2}$ - $V$  characteristics for SCLC fitting of electron only devices with ZnO or ZnO/[BMIM]BF<sub>4</sub> as interfacial layers

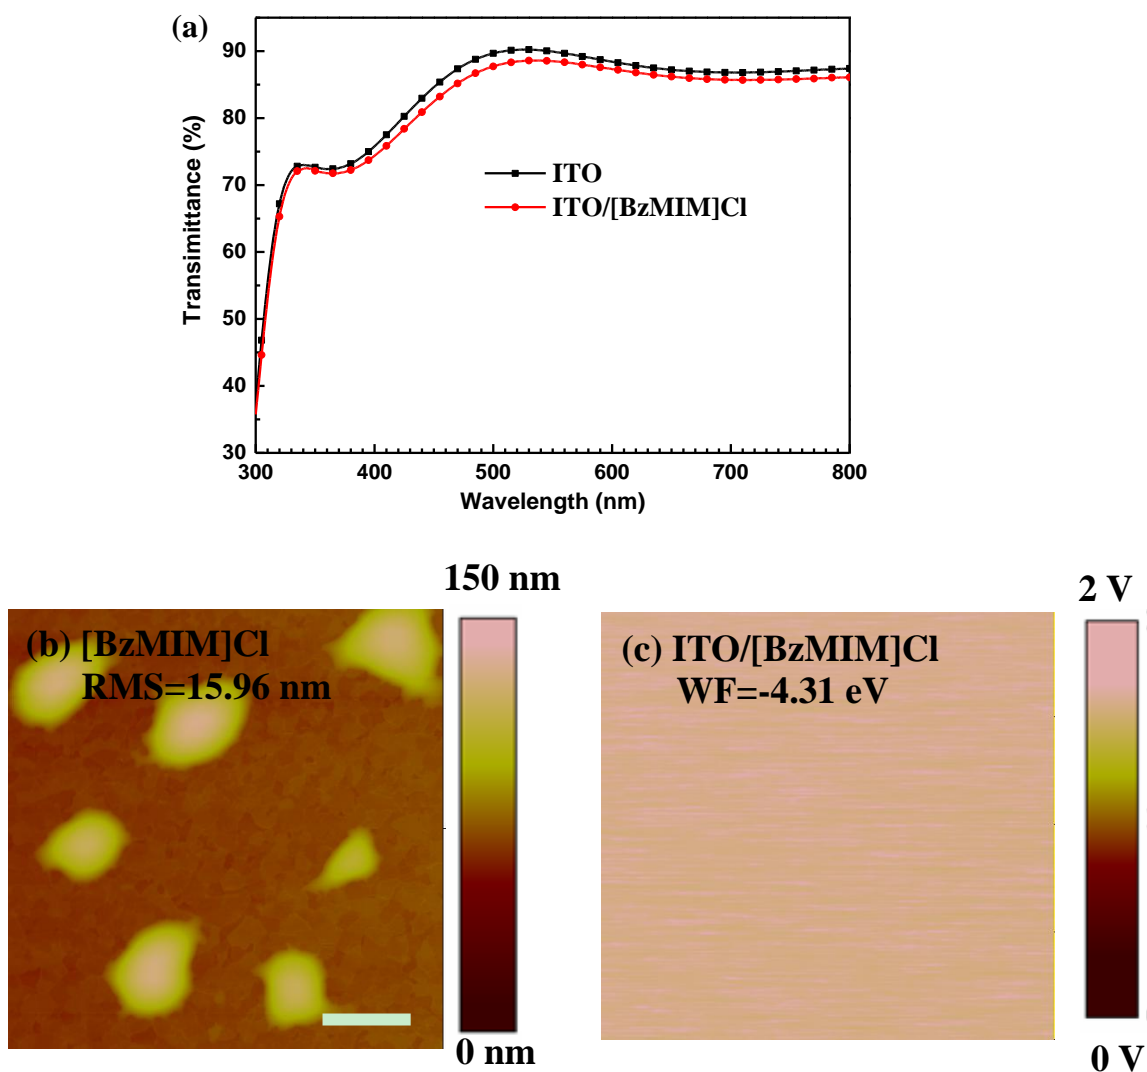

**Fig. S10** (a) Optical transmission spectra of bare ITO and ITO/[BzMIM]Cl; (b) AFM images and (c) surface potential images of [BzMIM]Cl on ITO.

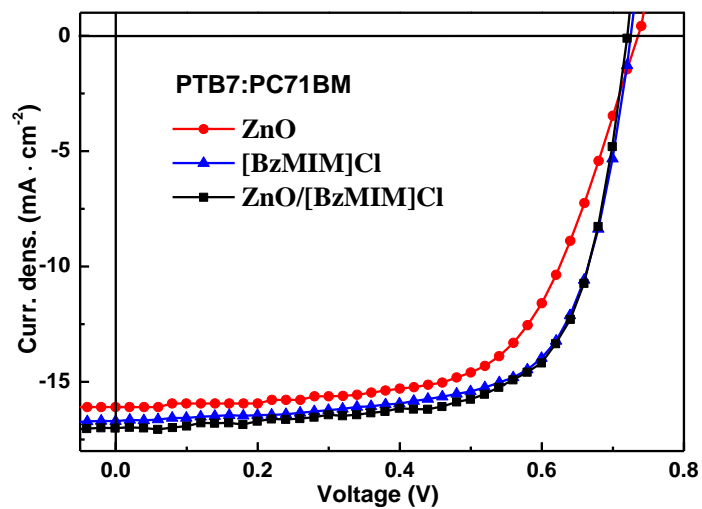

**Fig. S11** *J-V* characteristics of the PTB7:PC<sub>71</sub>BM inverted devices with various cathode interface layers (ZnO, [BzMIM]Cl and combined ZnO/[BzMIM]Cl).

References:

- [1] F. X. Xie, W. C. H. Choy, W. E. I. Sha, D. Zhang, S. Q. Zhang, X. C. Li, C. W. Leung, J. H. Hou, *Energy Environ. Sci.*, **2013**, *6*, 3372.
- [2] N. Baram, Y. Ein-Eli, *J. Phys. Chem. C*, **2010**, *114*, 9781.
- [3] F. Fabregat-Santiago, G. Garcia-Belmonte, I. Mora-Sero, J. Bisquert, *Phys. Chem. Chem. Phys.*, **2011**, *13*, 9083.
